# Supplementary material for: Meta-Analysis Approach to Measure the Effect of Integrated Nutrient Management on Crop Performance, Microbial Activity, and Carbon Stocks in Indian Soils
Source: Frontiers journal article supplement (doi:10.3389/fenvs.2021.724702), 2021-10-13
Supplement: Table_1.docx [file Table_1.docx]

**Supplementary Table 1** Summary of the effect of integrated nutrient management (INM) on crop performance of rice and wheat crops in India.

| **Effect of INM on rice and wheat crops in India** | **References** |
| --- | --- |
| Rice yield increased significantly as compared with unfertilized control. | Raju et al.(1993) |
| Saved N by 25-50 % under optimum economy retune in wheat. | Raguwanshi and Umat (1994) |
| Rice yield, N, P and K uptake increased by 92.1, 13.8 and 68.6 Kg ha-1, respectively. | Sharma et al. (1994) |
| Increased nutrient uptake and the net returns in rice. | Prasad and Rafey (1995) |
| Increased grain yield and total land productivity in double rice-cropping system. | Jana and Ghosh (1996) |
| Improved total grain production and profits in rice-wheat cropping system | Dubey et al. (1997) |
| Increased in rice yield and yield components | Budhar and Palaniappan (1997) |
| Significantly increased the grain yield of first rice crop by 74% and second rice crop by 79.8%. The highest increase of 0.68% in SOC was obtained. | Dubey and Verma (1999) |
| Improved yield attributes and grain, straw and biological yields of wheat. | Ranwa and Singh (1999) |
| Improved crop productivity in rice and wheat, SOC and Av. Pand Av. K content in soil. | Yadav (2001) |
| Significantly increased rice and wheat yields and available soil nutrients | K.N. Singh et al. (2001), S.K. Singh et al. (2001) |
| Increased the dry-matter accumulation, leaf-area index, effective tiller number, grains/ear, grain and straw yields, and photosynthesis of wheat. | Nehra et al. (2001) |
| Increased grain and straw yields, N uptake and P recovery of rice. | Chakraborty et al. (2001) |
| Significantly increased grain and straw yields of wheat. | Patidar and Mali (2001) |
| Grain yield of wheat crop by 0.3 t ha−1 | Singh (2002) |
| Significantly increased grain yield of rice by 1.3 t ha−1 | Prasad et al. (2002) |
| Increased growth parameters, yield attributes, yield and economics of wheat. | Pathak et al. (2002) |
| Significantly higher mean grain yield of rice (3.2 t ha−1) and wheat (2.9 t ha−1) and yield of succeeding wheat increased by 43.1 to 48.9%. There was a build-up of Av. N, P, K and organic carbon in soil in all INM plots. | Singh et al. (2002) |
| Increased grain yield of rice–wheat system by 1.2–1.3 t ha−1, straw yield by 0.7–2.3 t ha−1, N, P, and K uptake by 38–45, 7–10, and 25–42 kg ha-1, SOC content of soil by 0.09–0.15%, Av. N, P, and K by 6–24, 7–8, and 7–32 kg ha-1. | Sharma and Sharma (2002) |
| Improved carbohydrates (71.8%), proteins (12.2%), methionine and tryptophan content | Singh et al. (2003) |
| Increased the grain and straw yields of wheat, organic carbon and Av. P in soil. | Yadav et al. (2003) |
| Increased grain yield of rice by 49%. | Bhattacharyya et al. (2003) |
| INM with the combination of green-manure (100 kg N ha−1) resulted into the highest rice yield of 3.9 t ha−1. | Balasubramaniyan (2004) |
| Significantly increased grain yield of wheat. | Kumar et al. (2005) |
| Increased grain yield, straw yields and gross return of rice. | Barik et al. (2006) |
| FYM and poultry manure along with recommended dose of NPK fertilizers to wheat was essential for improving crop productivity, grain quality, profitability, soil health andsustainability of wheat. | Behera et al. (2007b) |
| Significantly increased the grain yield of durum wheat by 12% and 18% for farmyard manure and poultry manure application, respectively. | Behera et al. (2007a) |
| Significant grain yield increased by 17–41% regardless of organic sources, along with high N use efficiency. | Surekha et al. (2008) |
| Use of recommended dose of NPK along with FYM reduced the mining of K fromthe soil. | Mavi and Benbi (2008) |
| Using glyricidia and inorganic fertilizer supplying 50% N each resulted into thehighest gross monetary return in rice. | Nawlakhe and Jiotode (2008) |
| Recorded the highest grain (8.1 t ha−1) and straw yield (9.1 t ha−1) of hybrid rice, accompanying with high N, P and K uptake. | Kumar and Yadav (2009) |
| Significant increase in the grain yields of both rice (3.68 t ha−1) and wheat (0.98 t ha−1) over recommended dose of fertilizer. Increased SOC, soil enzymes, microbial biomass carbon and bacterial populations. | Nath et al. (2011) |
| Decreased N application; while improved rice yield and soil nutrient profile. | Jha et al. (2013) |
| Increased in grain yield in wheat | Bairwa et al. (2013) |
| Focused on principle, crop residue management, crop system,nutrient budget and soil C. | Parkinson (2013) |
| Increased boro rice yield and application of PSB and Azotobacter significantly increased available P and N in soil. | Garai et al. (2014) |
| Increased grain yield in both rice and wheat (an average of 10 years). | Das et al. (2014) |
| Higher grain yield value in wheat and reduction of inorganic nitrogen by one-fourth. | Kumara et al. (2015) |
| Recorded highest value of growth attributing characters in rice and wheat. | Singh et al. (2017) |
| Increased SOC and its active (microbial biomass C and dissolved organic C) and passive carbon fractions in soil and positively impact on the growth of the wheat crop. | Bharali et al. (2018) |
| Highest plant height, number of tillers per square meter, length of panicle/ear head, weight of panicle/ear head and test weight of rice and wheat. | Sah et al. (2018) |
